# Supplementary material
Source: publisher figshare collection journal article supplement (https://gsapubs.figshare.com/ndownloader/files/22743617)
Supplement: Supplementary file 1 [file 22743617]

**DATA REPOSITORY ITEM 2002043**

to accompany Whitehead et al. The origin of toasted quartz in impact structures

Table DR1: A selection of impact structures that contain toasted quartz. Structures in **bold** text are those for which thin section samples were studied for this work. Toasted quartz has also been observed by Short and Gold (1996) in the impact structures quoted in normal (non-bold) text.

| Structure              | Location         | Latitude  | Longitude  | Diameter<br>(km) | Age<br>(Ma) | Target rocks |           |
|------------------------|------------------|-----------|------------|------------------|-------------|--------------|-----------|
| Brent                  | Ontario, Canada  | N 46° 5'  | W 78° 29'  | 3.8              | 450 ± 30    | crystalline  | G         |
| <b>Charlevoix</b>      | Quebec, Canada   | N 47° 32' | W 70° 18'  | 54               | 357 ± 15    | mixed        | G M L     |
| <b>Clearwater East</b> | Quebec, Canada   | N 56° 5'  | W 74° 7'   | 26               | 290 ± 20    | mixed        | G M L     |
| <b>Clearwater West</b> | Quebec, Canada   | N 56° 13' | W 74° 30'  | 36               | 290 ± 20    | mixed        | G M L     |
| <b>Haughton</b>        | Nunavut, Canada  | N 75° 22' | W 89° 41'  | 24               | 23 ± 1      | mixed        | G L       |
| <b>Lappajärvi</b>      | Finland          | N 63° 12' | E 23° 42'  | 23               | 77.3 ± 0.4  | mixed        | G C L     |
| <b>Manicouagan</b>     | Quebec, Canada   | N 51° 23' | W 68° 42'  | 100              | 214 ± 1     | mixed        | G A M L C |
| Manson                 | Iowa, U.S.A.     | N 42° 35' | W 94° 33'  | 35               | 73.8 ± 0.3  | mixed        | G C L E   |
| <b>Mistastin</b>       | Labrador, Canada | N 55° 53' | W 63° 18'  | 28               | 38 ± 4      | crystalline  | G A       |
| <b>Popigai</b>         | Russia           | N 71° 40' | E 111° 40' | 100              | 35.7 ± 0.2  | mixed        | G C L     |
| Ries                   | Germany          | N 48° 53' | E 10° 37'  | 24               | 15.1 ± 0.1  | mixed        | G L C     |
| <b>Rochechouart</b>    | France           | N 45° 50' | E 0° 56'   | 23               | 214 ± 8     | mixed        | G (C)     |
| Steen River            | Alberta, Canada  | N 59° 30' | W 117° 38' | 25               | 95 ± 7      | mixed        | G C       |
| <b>Wanapitei</b>       | Ontario, Canada  | N 46° 45' | W 80° 45'  | 7.5              | 37 ± 2      | crystalline  | G M       |
| West Hawk              | Manitoba, Canada | N 49° 46' | W 95° 11'  | 2.44             | 100 ± 50    | crystalline  | G M       |

Legend: crystalline includes igneous and metamorphic rocks; 'mixed' denotes both crystalline and overlying sedimentary units.

G - granites, gneisses and schists; A - anorthosites; M - mafic igneous and metamorphic rocks; C - clastic sedimentary rocks;

L - limestones and dolomites; E - gypsum.
